# Supplementary material
Source: Springer Nature journal article supplement (https://www.springermedizin.de/resource/supplementary/13012_2010_300_MOESM5_ESM.pdf/9629666)

Year/Months

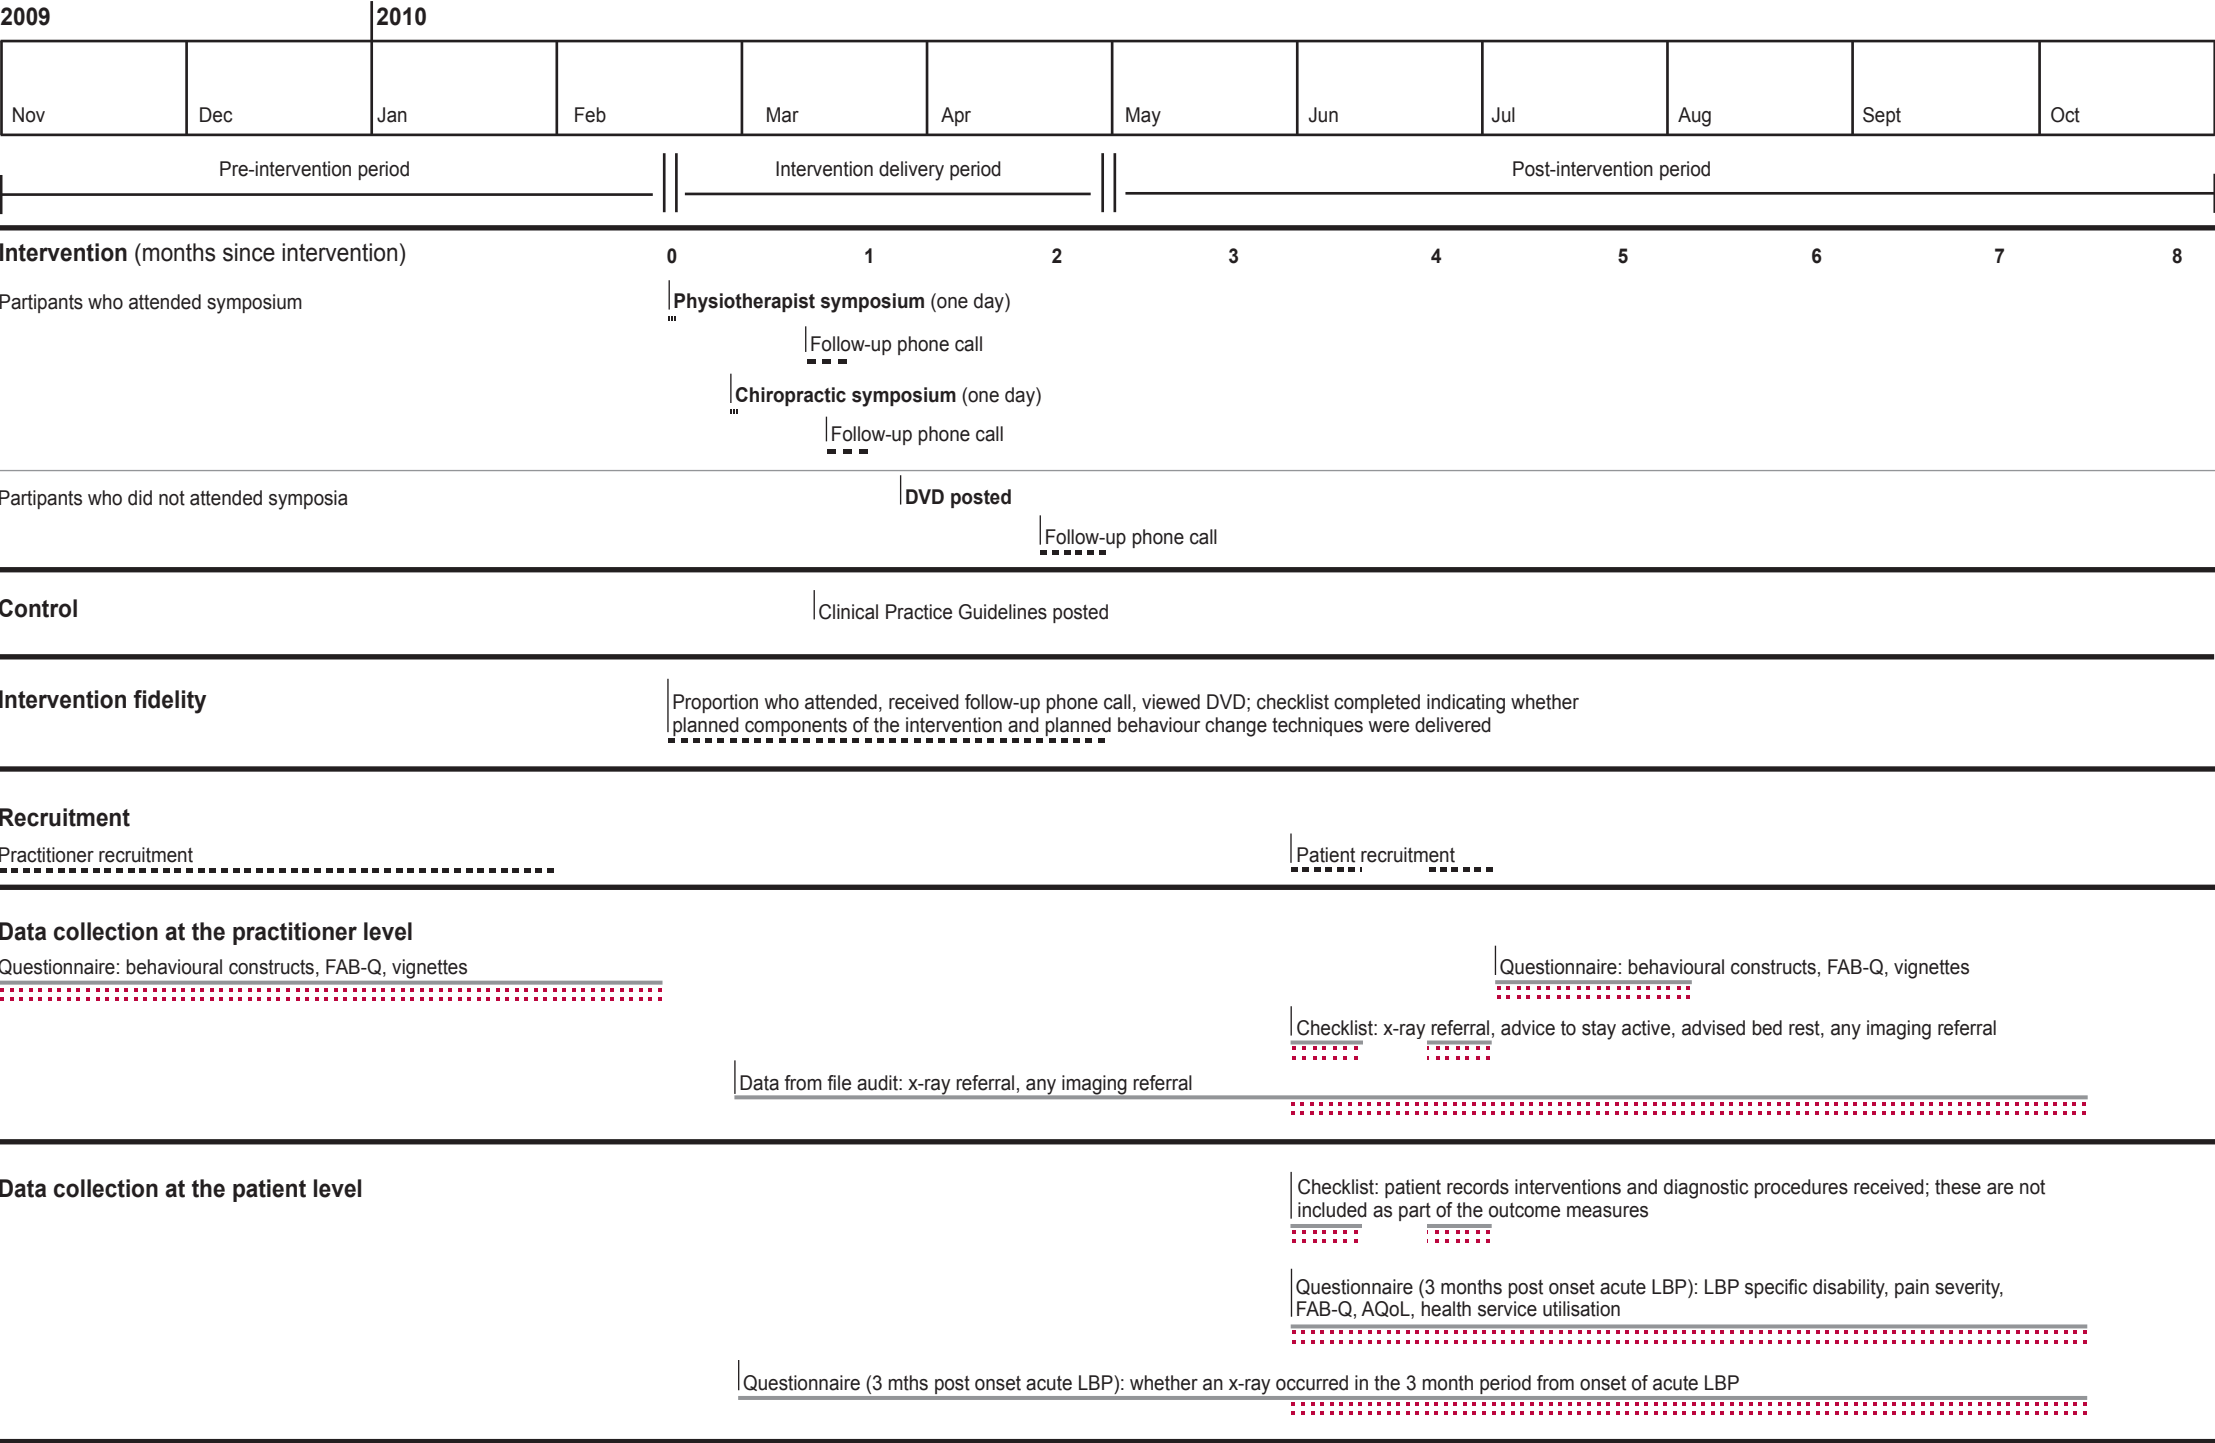

Supplement: MOESM5 [file 9629666]
